# Supplementary material
Source: MDPI journal article supplement (https://www.mdpi.com/2673-5261/2/3/19)

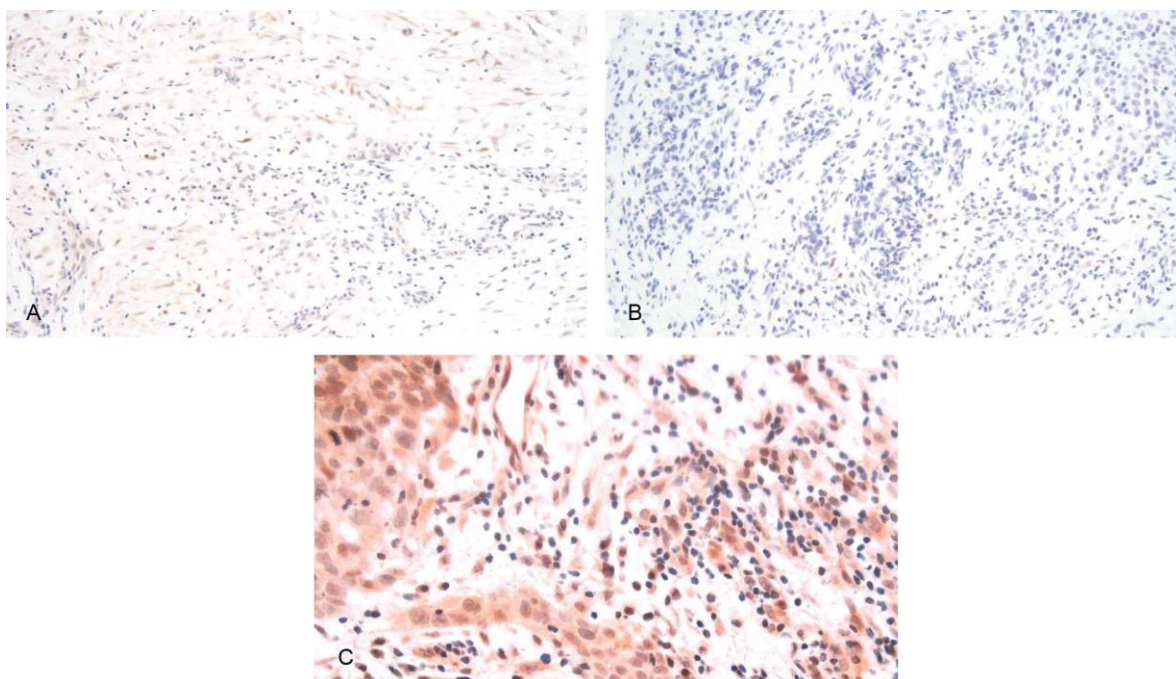

**Supplementary figure 1.** JMJD3 IHC expression in stromal cells of pleural mesothelioma.

Supplement: s1 [file s1]
